# Supplementary material for: Anti-CD19 Chimeric Antigen Receptor T Cells in Combination With Nivolumab Are Safe and Effective Against Relapsed/Refractory B-Cell Non-hodgkin Lymphoma
Source: Front Oncol. 2019 Aug 19;9:767. doi: 10.3389/fonc.2019.00767 (PMC6709654; doi:10.3389/fonc.2019.00767)
Supplement: Supplementary file 1 [file Table_1.xlsx]

## Sheet: Characters
Supplementary Table 1
The clinical and disease specific characteristics of the patients
Patient no.	Age (years)	Sex	Dignosis/ Stage	Disease status	Prior treatment
					Chemotherapy regimens#	ASCT	Others
1	66	F	DLBCL/Ⅳ	Primary refractory*	5*CHOP/R-COP/R-VP/R-DHAP	N	CIK, DC-CIK
2	62	F	DLBCL/Ⅳ	Primary refractory	R-CHOP/EPOCH/R-EPOCH	N
3	53	M	DLBCL/Ⅳ	Relapsed	2*R-CHOP/2*E-CHOP	N
4	62	M	MCL/Ⅳ	Relapsed	CHOP/CMOP/2*MINE/FMC/ EPOCH	N
5	76	F	DLBCL/Ⅳ	Relapsed	2*R-COP/2*R-CHOP	N
6	60	F	DLBCL/Ⅳ	Primary refractory	4*R-CHOP	N
7	59	M	DLBCL/Ⅲ	Relapsed	4*R-CHOP/R-COP	Y
8	40	M	DLBCL/Ⅳ	Primary refractory	VP/hyperCVAD(A+B+A)	N
9	83	M	DLBCL/Ⅳ	Primary refractory	R-CVP/4*R-CHOP/R-COP	N
10	33	M	DLBCL/Ⅳ	Primary refractory	4*R-CHOP/R-EPOCH/GEMOX	N
11	48	M	DLBCL/Ⅲ	Primary refractory	9*R-CHOPE	N
#Abbreviations: ASCT, autologous stem cell transplantation; R, rituximab; CHOP, cyclophosphamide, adriamycin, vincristine, prednisone; COP, cyclophosphamide, vincristine, prednisone; VP: vepeside; EPOCH, etoposide, prednisone, vincristine, cyclophosphamide, doxorubicin; DAHP, cisplatin, cytarabine, dexamethasone; E-CHOP: etoposide, cyclophosphamide, adriamycin, vincristine, prednisone; CMOP: cycl…
