# Supplementary material for: Anti-CD19 Chimeric Antigen Receptor T Cells in Combination With Nivolumab Are Safe and Effective Against Relapsed/Refractory B-Cell Non-hodgkin Lymphoma
Source: Front Oncol. 2019 Aug 19;9:767. doi: 10.3389/fonc.2019.00767 (PMC6709654; doi:10.3389/fonc.2019.00767)
Supplement: Supplementary file 2 [file Table_2.xlsx]

## Sheet: Sheet1
Supplementary Table 2
Patient response and toxicity
Patient no.	Disease status at study entry	Conditioning regimen before T cell infusion	No. of CAR-positive T cells infused(106/kg)	Reseponse	CRS grade
1	SD	FC	8	CR	1
2	PD	FC	7.2	NR	None
3	PD	FC	5	SD	2
4	PD	FC	2	PR	1
5	PD	FC	8	NR	None
6	SD	FC	10	PR	None
7	SD	FC	10	CR	None
8	SD	FC	10	CR	1
9	PD	FC	5	CR	1
10	PD	FC	12	PR	2
11	PD	FC	9.4	CR	2
#Abbreviations: SD, stable disease; PD, progressive disease; FC, fludarabine, cyclophosphamide; CR, complete remission; NR, no response; PR, partial remission; SD, stable disease; CRS, cytokine release syndrome.
